# Supplementary material for: Factors and Regional Differences Associated with Endometriosis: A Multi-Country, Case–Control Study
Source: Springer Nature journal article supplement (doi:10.1007/s12325-016-0366-x), 2016-06-24
Supplement: MOESM1 [file 10543970]

## Supplemental data tables

**Supplemental Table S1. Retrospective data collected by the investigator on the study visit day**

| <b>Category</b>                        | <b>Item</b>                                                                                                                                                                                                                                                                                                                                                                                                                                                                                                                                                          |
|----------------------------------------|----------------------------------------------------------------------------------------------------------------------------------------------------------------------------------------------------------------------------------------------------------------------------------------------------------------------------------------------------------------------------------------------------------------------------------------------------------------------------------------------------------------------------------------------------------------------|
| Socio-demographic data                 | Country identifier, date of birth, height, weight, weight recent changes, body mass index, ethnicity, blood type and rhesus, natural hair color, eye color, skin color, freckles, educational level, marital status, smoking status, alcohol dependence*                                                                                                                                                                                                                                                                                                             |
| Pre-surgery complaints                 | Non-cyclic chronic pelvic pain (intensity, localization), dysmenorrhea (primary/secondary, intensity impact on social/professional/sex life, initiation of oral contraception for dysmenorrhea [duration, prescription modality]), pain at time of ovulation (intensity), deep dyspareunia (intensity), infertility (history of infertility [duration, tubal status], history of infertility treatments, partner semen analyses), gastrointestinal symptoms during menstruation (including rectorrhagia), urinary symptoms during menstruation (including hematuria) |
| Surgery for endometriosis <sup>†</sup> | Procedure (laparoscopy or laparotomy), date of surgery, surgery indications, menstrual cycle at time of surgery (date of last period, day of cycle at surgery, hormonal treatment at time of surgery)                                                                                                                                                                                                                                                                                                                                                                |
| Endometriosis status                   | Surgery/histological results, lesions localization, endometriosis status                                                                                                                                                                                                                                                                                                                                                                                                                                                                                             |
| Endometriosis history                  | Previous endometriosis diagnosis (age at first endometriosis symptoms, age when medical attention sought, age at first diagnosis), previous endometriosis surgery, previous use of hormonal treatment                                                                                                                                                                                                                                                                                                                                                                |
| Associated medical history             | History of associated diseases: cancer, autoimmune diseases, allergic diseases, other diseases. Uterine surgical history: past uterine surgical procedures                                                                                                                                                                                                                                                                                                                                                                                                           |
| Gynecologic history                    | Menstrual and ovulation endometriosis history: age at menarche, regular predictable menses, cycle length, patient's habits (tampon use, practice of vaginal douching), secondary ovulatory disorders<br>Contraception history: combined oral contraceptive pill (age at onset, duration, current use,                                                                                                                                                                                                                                                                |

| Category               | Item                                                                                                                                                                                                                                                                                                                                                                                                                                                                                                                                                                                                                                                                                                                                                                                                                                                         |
|------------------------|--------------------------------------------------------------------------------------------------------------------------------------------------------------------------------------------------------------------------------------------------------------------------------------------------------------------------------------------------------------------------------------------------------------------------------------------------------------------------------------------------------------------------------------------------------------------------------------------------------------------------------------------------------------------------------------------------------------------------------------------------------------------------------------------------------------------------------------------------------------|
| Family medical history | <p>prescription modality), progestin only oral contraceptive pills, intrauterine device (age at onset, duration, current use), barrier contraception, tubal ligation</p> <p>Gestation and parity: number of gestations, number of gestations with delivery, number and detail of gestations without delivery, obstetric data (age at first pregnancy with delivery, number of vaginal delivery, lactation, preterm delivery, small for gestational age baby, stillbirth, pre-eclampsia, antepartum hemorrhage)</p> <p>Birth of patient: premature baby, twin pregnancy, breastfed, birth weight, number of siblings and order, mother's age at birth</p> <p>History of endometriosis in first-degree relatives, history of malignancies (first- and second-degree relatives), history of early menopause in family, history of weight problems in family</p> |

\*Collected on the visit day

†Last endometriosis diagnosis

**Supplemental Table S2. Prospective data provided by the patient on the study visit day**

| <b>Category</b> | <b>Item</b>                                                                                                |
|-----------------|------------------------------------------------------------------------------------------------------------|
| Environment     | Pollution exposure, smoking environment, sun exposure, employment status                                   |
| Dietary habit   | Consumption of alcohol, coffee, convenience food, sugar, meat/fish, milk, black tea, vegetables, fat, salt |
| Health and mood | Overall health status, exercise, sexual abuse, stress, depression, anxiousness, sleep disorders            |
